# Supplementary material for: Overexpression of Carnitine Palmitoyltransferase-1 in Skeletal Muscle Is Sufficient to Enhance Fatty Acid Oxidation and Improve High-Fat Diet–Induced Insulin Resistance
Source: Oxford University Press journal article supplement (doi:10.2337/db08-1078), 2008-12-11
Supplement: db08-10781_suppl.doc [file db08-10781_suppl.doc]

**Supplemental Data**

**Overexpression of carnitine palmitoyltransferase-1 in skeletal muscle is sufficient to enhance fatty acid oxidation and improve high fat diet-induced insulin resistance.**

**Bruce CR et al.**

**Supplemental Research Design and Methods**

**Materials**

Antibodies were obtained from the following sources: CPT1 (Alpha Diagnostic International), IRS-1 tyr612 (Biosource, CA, USA), IRS-1 ser307 and total IRS-1 (Upstate Cell SignalingSolutions), Akt phospho and total, (Cell Signaling Technology), ACC phospho (Cell Signaling Technology) and total (Upstate Cell SignalingSolutions), IKBα phospho and total (Cell Signaling Technology), JNK phospho and total (Cell Signaling Technology), MLK3 phospho and total (Cell Signaling Technology) and an antibodycocktail that recognizes several subunits of the mitochondrialrespiratory chain (MS601; Mitosciences).

**In vivo electrotransfer**

Vectors were propagated in selective media and DNA extracted,purified using Endotoxin-free Maxi- or Mega-Prep kits (Qiagen, Melbourne,Victoria, Australia), and resuspended in sterile 0.9% saline.Anesthesia was induced with 5% and was maintained with 1–2% halothane in oxygen. Thereafter, animals’ hindlimbs were shaved and prepared with a chlorhexidine-ethanolsolution. The TA muscles were injected in an obliquefashion transcutaneously along their length with 0.5 μg/μLtotal DNA in saline using an insulin syringe. Rats receivedsix spaced 50 µL injections along the TA muscle.This was followed by the application of a pair of plate electrodesacross the distal limb connected to an ECM-830 electroporatordevice (BTX, Holliston, MA, USA). The electroporation protocol consisted of one 800 V/cm, 100 ms pulse followed by four80 V/cm, 100 ms pulses at 1 Hz. This protocol has shown to result in a transfection rate of ~50% of fibres (1). The TA muscle was sampled 7 days after transfecting the tissue as this is when peak overexpression has been shown to occur (1,2). In a subset of animals, the EDL muscle was sampled 7 days after the electroporation procedure. Unless otherwise stated, the muscles were rapidly freeze clamped using precooled tongs and stored at -80°C.

**References**

1. Cleasby ME, Davey JR, Reinten TA, Graham MW, James DE, Kraegen EW, Cooney GJ: Acute bidirectional manipulation of muscle glucose uptake by in vivo electrotransfer of constructs targeting glucose transporter genes. *Diabetes* 54: 2702-2711, 2005.
2. Bruce CR, Brolin C, Turner N, Cleasby ME, van der Leij FR, Cooney GJ, Kraegen EW: Overexpression of carnitine palmitoyltransferase 1 (CPT1) in skeletal muscle in vivo increases fatty acid oxidation and reduces triacylglycerol esterification. *Am. J. Physiol. Endocrinol. Metab.* 292: E1231-E1237, 2007.

**Supplementary Figure 1. The effect of CPT1 overexpression on the expression and phosphorylation of mitochondrial respiratory chain proteins and PGC1-α in skeletal muscle from Chow and high fat fed (HFD) rats.** Muscles takenfrom a leg electroporated with an empty vector or CPT1 vector


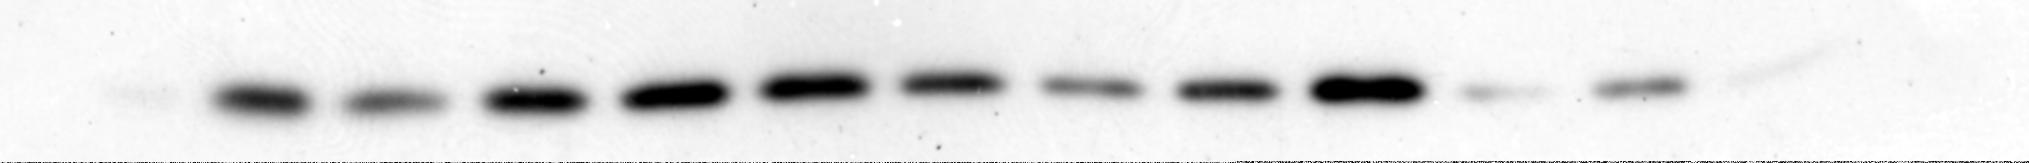


Chow HFD

CPT1 vector - + - +

PGC1α

Complex I

Complex II

Complex V


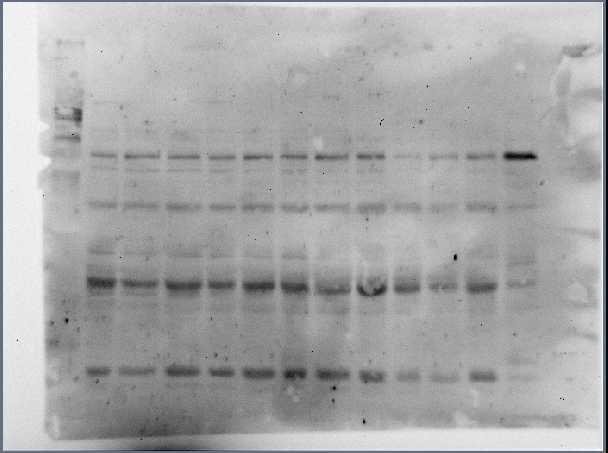

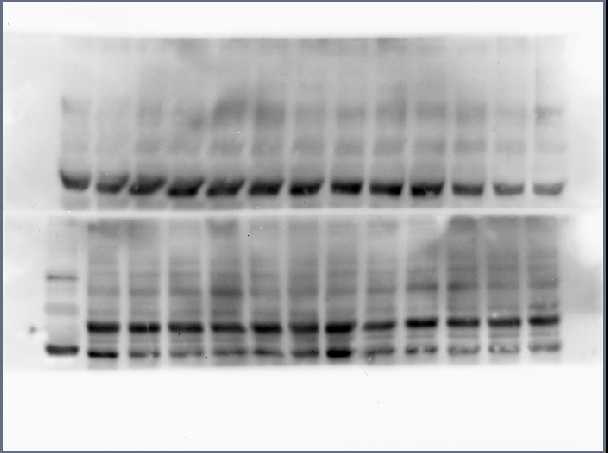


**Supplementary Figure 2. CPT1 overexpression does not alter insulin action in muscle from Chow fed animlas *ex vivo.*** Freecarnitine levels in TA muscle from a leg electroporated with an empty vector or CPT1 vector, in animals placed either on a standard chow diet (Chow) or high fat (HFD) diet for 4 weeks. Data are mean ± SEM; n = 8.

**Supplementary Figure 3. CPT1 overexpression does not alter insulin action in muscle from Chow fed animlas *ex vivo.*** Rates of basal and insulin-stimulated 2-deoxyglucose uptake in isolated EDL muscle from a leg electroporated with an empty vector or CPT1 vector, in animals fed a Chow diet for 4 weeks (A); representative immunoblots and quantification of phosphorylation of (Tyr612)/total IRS1 (B) and phosphorylation (Ser473)/total Akt (C) in isolated EDL muscle obtained from a leg electroporated with an empty vector or CPT1 vector, in animals fed a Chow diet for 4 weeks and then incubated in the absence (Basal) or presence (Insulin) of insulin. Data are mean ± SEM; n = 7.


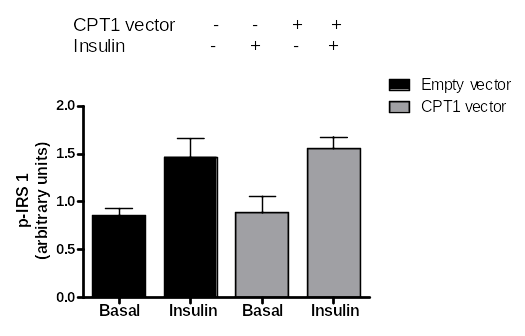

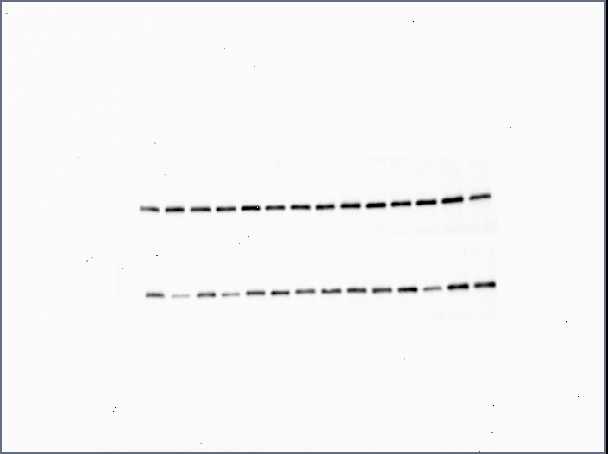

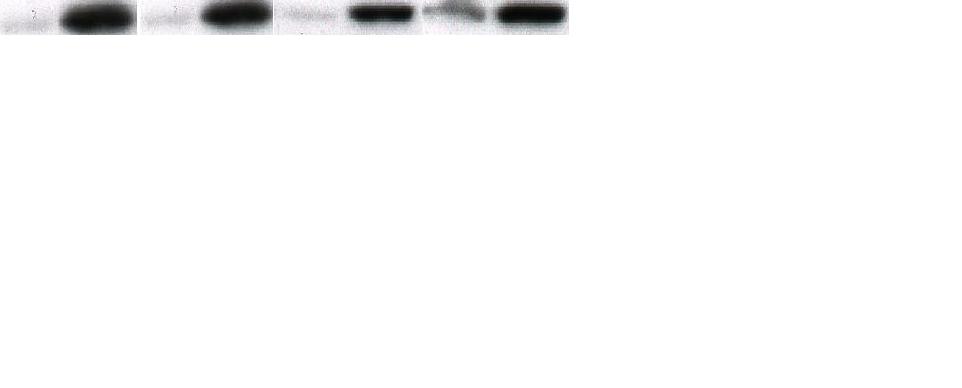

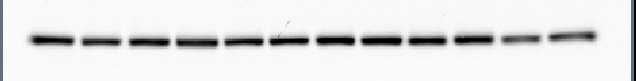


pY IRS-1 612

Total IRS-1

p-Akt ser473

Total Akt

A

B

C

**Supplementary Figure 4. CPT1 overexpression does not alter skeletal muscle insulin action *in vivo.*** 2-deoxyglucose uptake (Rg′) (A), and representative immunoblots and quantification of phosphorylation (Ser473)/total Akt (B) in TA muscle obtained from a leg electroporated with an empty vector or CPT1 vector, in animals placed either on a Chow diet for 4 weeks and then underwent a hyperinsulinemic euglycemic clamp for 120 min. Data are mean ± SEM; n = 7.


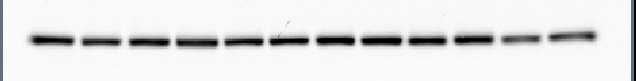

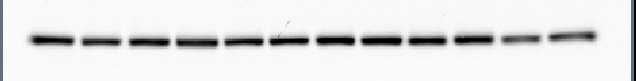

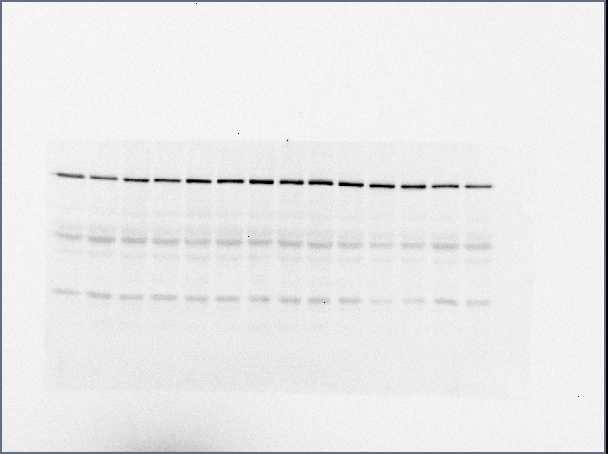

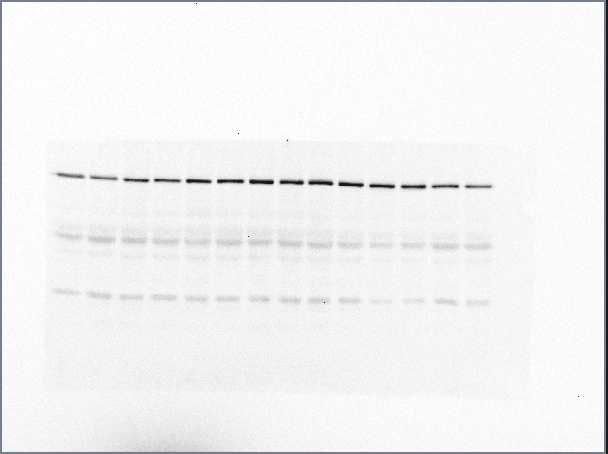


A

B

**Supplementary Figure 5. The effect of CPT1 overexpression on the expression and phosphorylation of proteins involved in lipid metabolism and insulin action in skeletal muscle of chow and high fat fed rats.** Muscle lysates were immunoblotted with specific antibodies for FAT/CD36; total and phosphorylated AMPK, ACC, IKBα and MLK3; and cytosolic and membrane bound PKCα and δ.


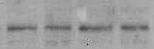

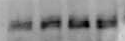

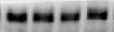

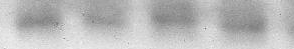

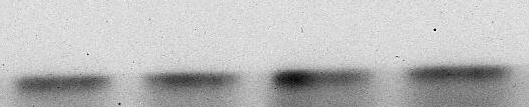

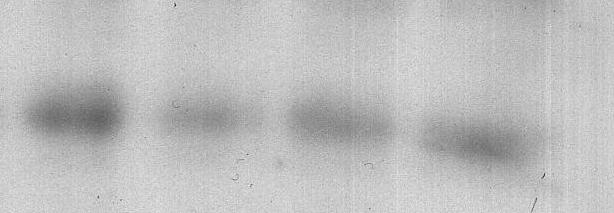

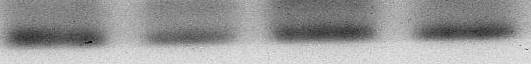

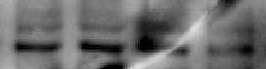

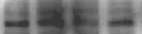


FAT/CD36

Total AMPK

Total ACC

Total MLK3


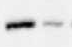

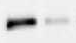

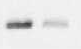

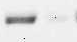

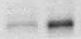

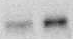

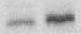

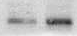


Chow

HFD

C M C M

C M C M


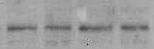

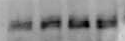

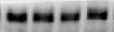

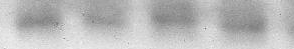

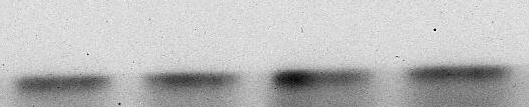

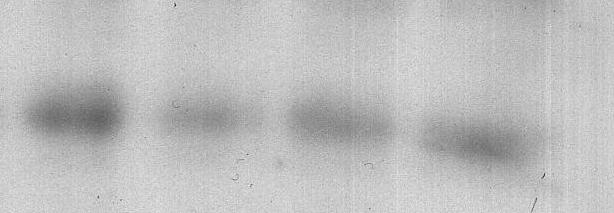

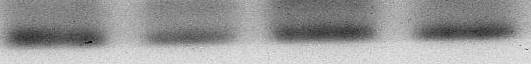

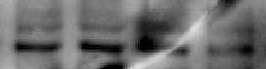

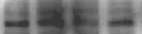


FAT/CD36

pAMPK (Thr172)

Total AMPK

pACC (Ser79)

Total ACC

pIKBα (Ser32)

Total IKBα

pMLK3 (Thr277/Ser281)

Total MLK3


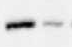

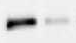

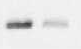

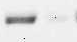

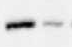

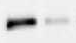

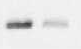

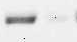


PKCα

CPT1 vector - + - +

Chow


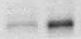

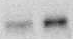

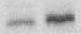

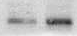

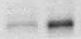

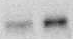

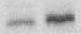

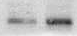


PKCδ

HFD

Chow

HFD

C M C M

C M C M

Empty vector

CPT1 vector

Empty vector

CPT1 vector
